# Supplementary material
Source: PubMed Central journal article supplement (PMC8891076)
Supplement: NIHMS1772529-supplement-Supplemental_material.pdf [file NIHMS1772529-supplement-Supplemental_material.pdf]

SUPPLEMENTAL FIGURES

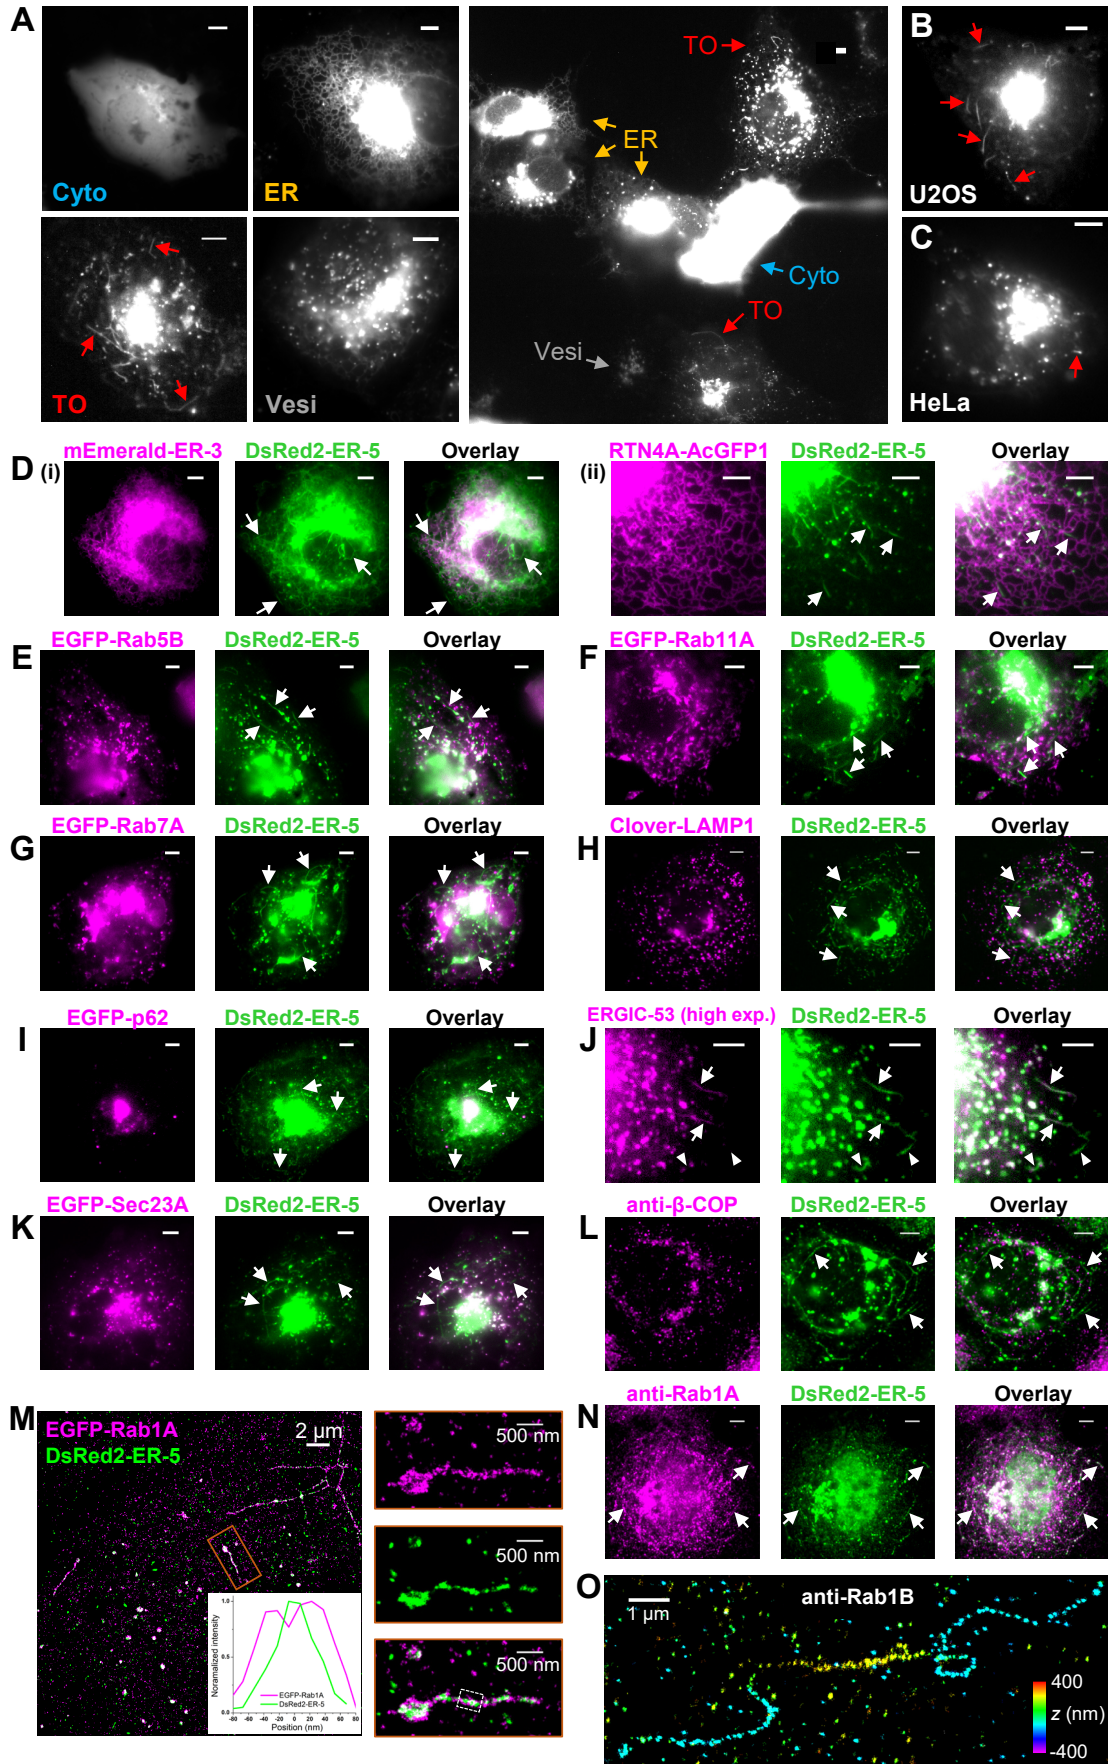

**Figure S1. Characterization of DsRed2-ER-5-Containing Tubular Organelles, Related to Figure 1**

(A) Representative images of the four types of subcellular distribution of DsRed2-ER-5 in COS-7 cells: cytoplasm (Cyto), ER, tubular organelles (TOs), and vesicles (Vesi).

(B,C) Representative images of DsRed2-ER-5 TOs in U2OS (B) and HeLa (C) cells.

(D-K) Two-color fluorescence micrographs of DsRed2-ER-5 (green) in live COS-7 cells with the ER markers mEmerald-ER-3 [D-(i)] or RTN4A-AcGFP1 [D-(ii)], the early endosome marker EGFP-Rab5B (E), the recycling endosome marker EGFP-Rab11A (F), the late endosome marker EGFP-Rab7A (G), the lysosome marker Clover-LAMP1 (H), the autophagosome marker EGFP-p62 (I), the highly expressed ERGIC marker mEmerald-ERGIC-53 (J), and the ERES marker EGFP-Sec23A (K). Arrowheads in (J) indicate TOs negative for ERGIC-53.

(L) Immunofluorescence of the COPI vesicle marker  $\beta$ -COP vs. DsRed2-ER-5.

(M) Two-color STORM of immunolabeled DsRed2-ER-5 and EGFP-Rab1A showing that Rab1A decorates the surface of the TO. Right panels: separated and merged color channels for a zoom-in of the orange box marked in the left panel. Inset: cross-sectional intensity profiles for the two color channels along a TO, for the region marked by the dotted box in the zoom-in image.

(N) Immunofluorescence of endogenous Rab1A in the COS-7 cell, showing good colocalization with the DsRed2-ER-5 TOs.

(O) Additional 3D-STORM image of immunostained endogenous Rab1B in the untransfected COS-7 cell, highlighting a long, twisted TO. Color encodes axial position.

Scale bars: 5  $\mu$ m except for the labeled scale bars in (M,O). Arrows point to TOs.

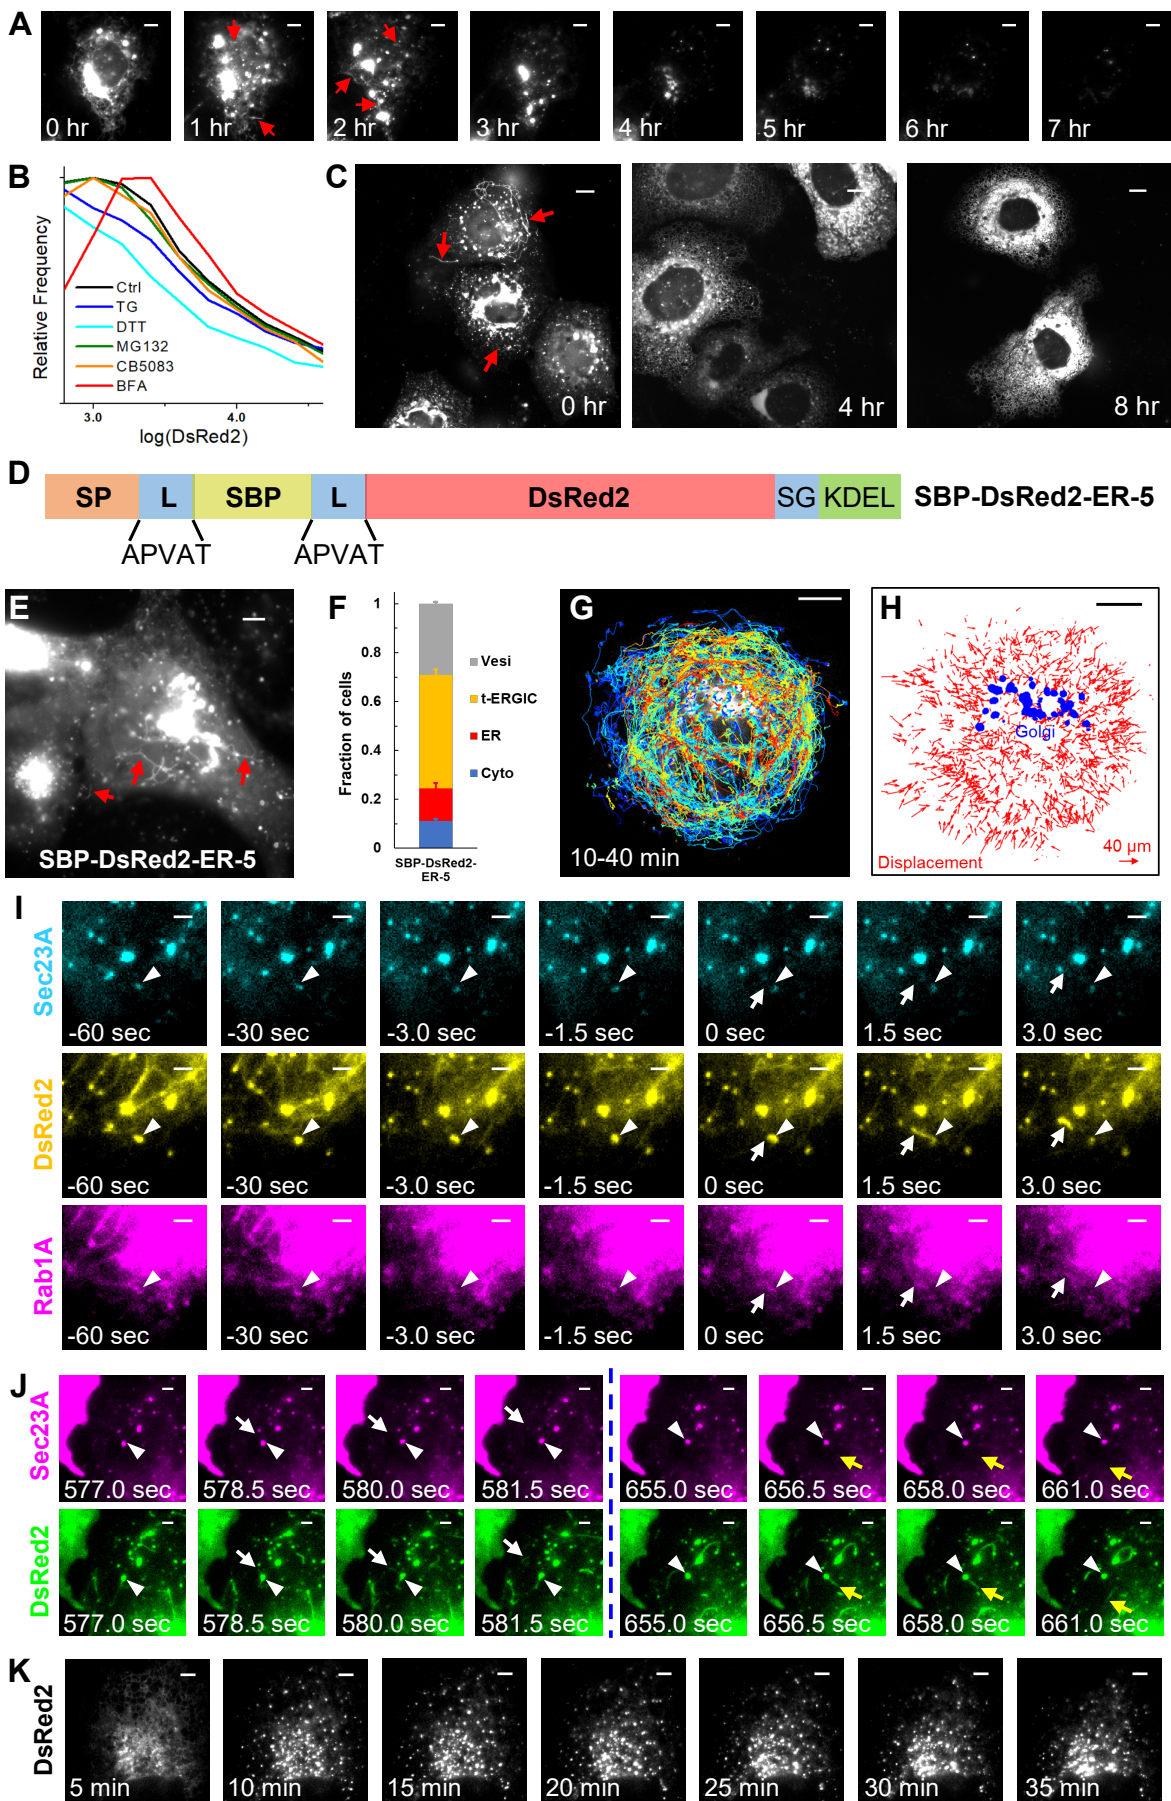

**Figure S2. The t-ERGIC Mediates ER-to-Golgi Trafficking by Shuttling between the ER and the Golgi, Related to Figure 2**

(A) Time-lapse imaging of DsRed2-ER-5 in an unsynchronized COS-7 cell, showing its redistribution from the ER to the TOs, Golgi, and vesicles accompanied by a reduction of fluorescence intensity.

(B) Flow cytometry histograms of DsRed2-ER-5-transfected COS-7 cells treated with 0.1% DMSO (Ctrl), 1  $\mu$ M thapsigargin (TG), 7 mM dithiothreitol (DTT), 5  $\mu$ M MG132, 1  $\mu$ M CB-5083, or 1  $\mu$ M brefeldin A (BFA) for 4 hr.

(C) Representative fluorescence micrographs of DsRed2-ER-5 in COS-7 cells with brefeldin A treatments of 0, 4, and 8 hr.

(D-F) Schematic of SBP-DsRed2-ER-5 (D), a representative image of its presence in the t-ERGIC (E), and its subcellular distribution (F) in transfected COS-7 cells. Error bars: SEM ( $n = 3$  with  $\sim 50$  cells in each replicate).

(G) Single-particle tracking of post-ER carriers in Figure 2D. The color of each trajectory encodes the maximum speed reached.

(H) Displacement map of the trajectories in (G). The Golgi apparatus is marked blue. Arrows point to the direction of displacement (from the initial position to the final position), and their magnitudes are scaled according to the legend.

(I) Another example of *de novo* formation of SBP-DsRed2-ER-5 t-ERGIC (arrow) from the ERES (arrowhead) in a RUSH experiment, similar to Figure 2G. 80  $\mu$ M biotin was added at time -11 min for cargo release.

(J) RUSH image sequence showing that the same COPII-coated ERES (arrowhead) sequentially generates two t-ERGICs (white and yellow arrows) in opposite directions. 80  $\mu$ M biotin was added at time 0.

(K) Co-transfection of SBP-DsRed2-ER-5 with a dominant negative Rab1A (Rab1A-N124I) inhibited the generation of t-ERGIC in RUSH, and the cargo was stuck at the ERES. 80  $\mu$ M biotin was added at time 0.

Scale bars: 10  $\mu$ m (C,G,H); 5  $\mu$ m (A,E,K); 2  $\mu$ m (I,J). Arrows in (A,C,E) indicate t-ERGICs.



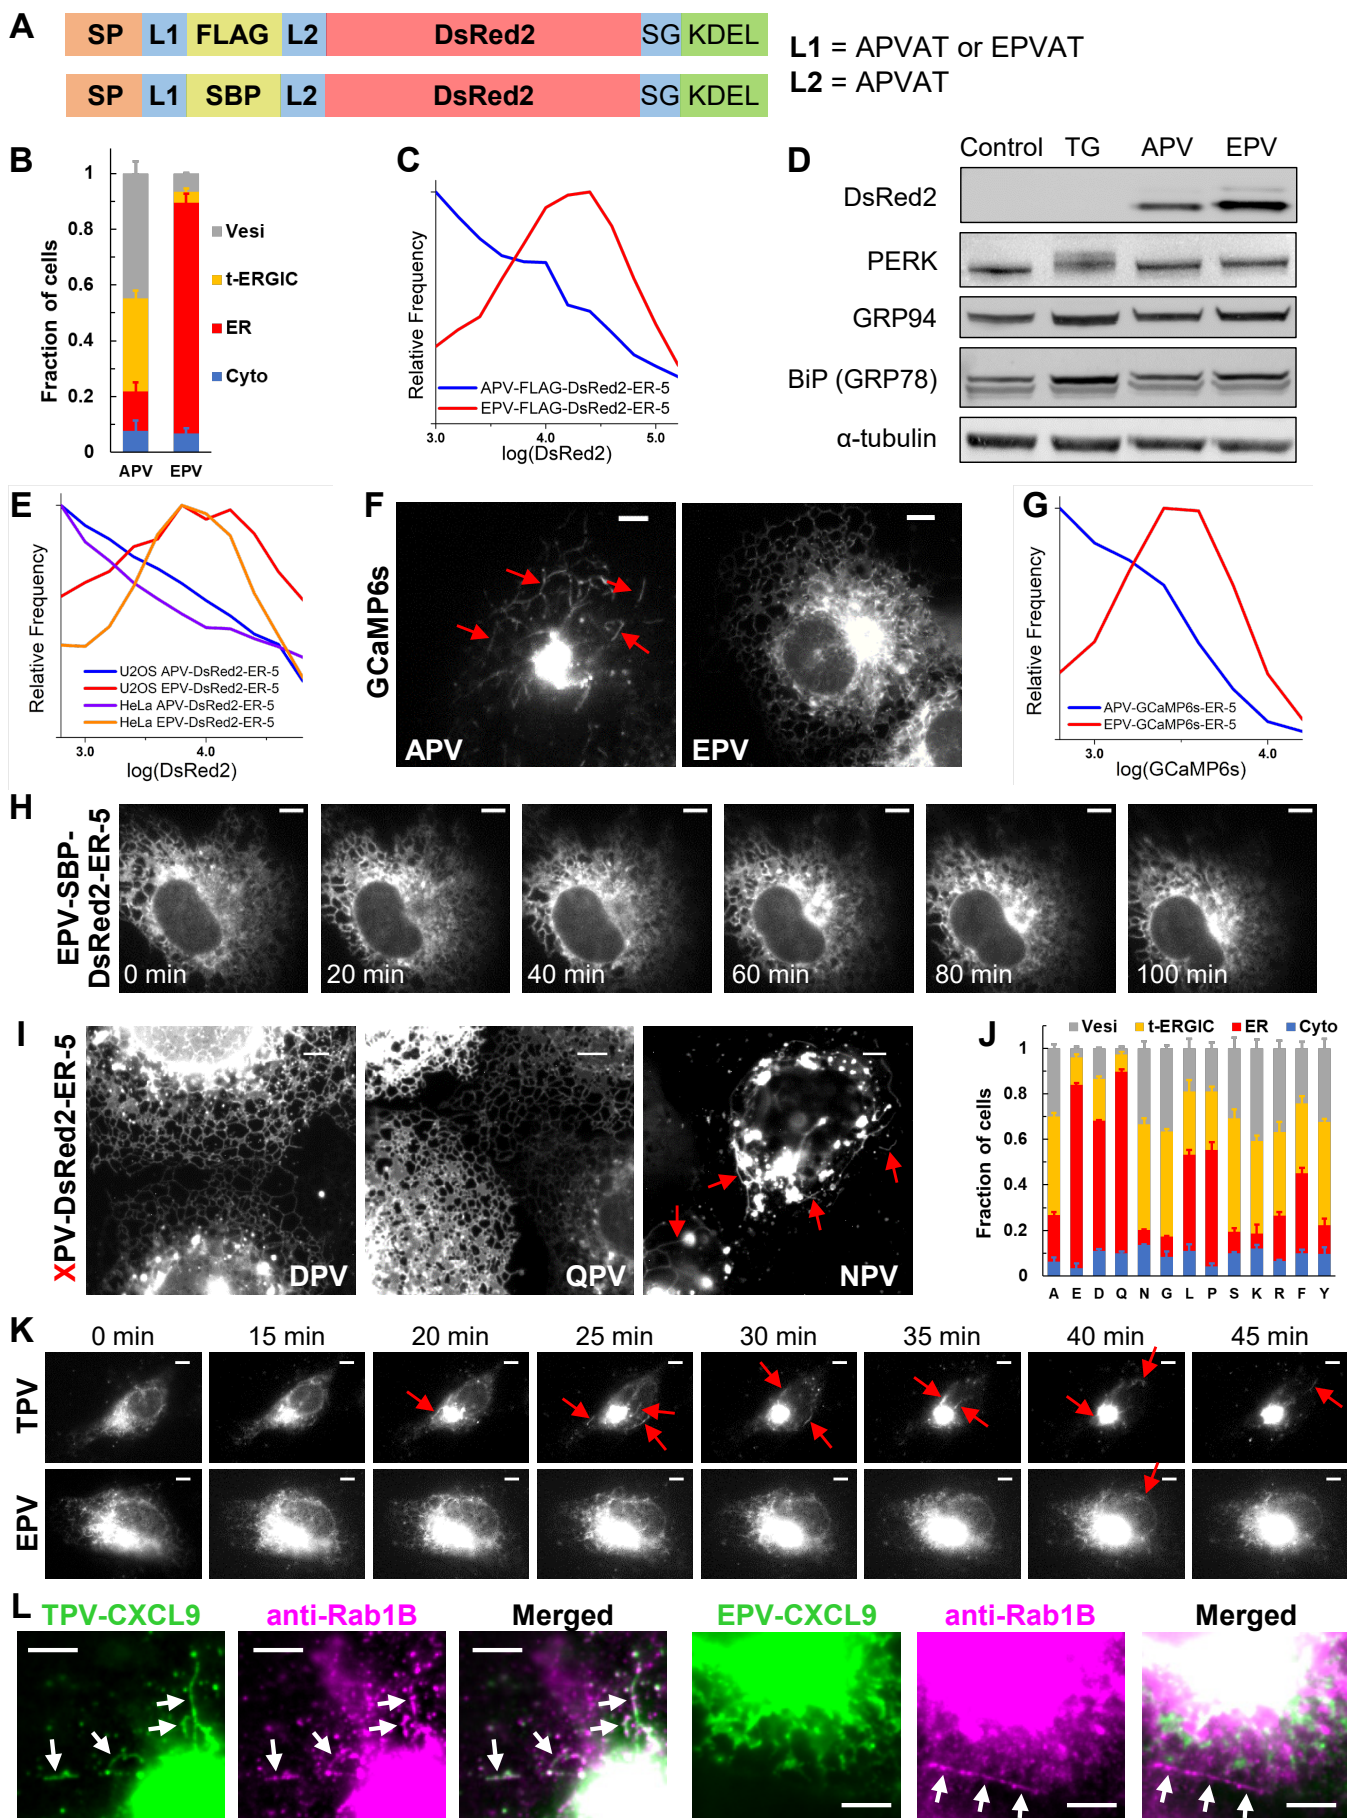

**Figure S3. The N-terminus Rule of ER-to-Golgi Transport by t-ERGIC Applies to Different Cargoes, Related to Figure 3**

(A) Sequences of APV/EPV-FLAG-DsRed2-ER-5 and APV/EPV-SBP-DsRed2-ER-5.

(B,C) Subcellular distributions (B) and flow cytometry histograms (C) of APV/EPV-FLAG-DsRed2-ER-5.

(D) Immunoblots of APV/EPV-DsRed2-ER-5-transfected cells and non-transfected cells with or without 1  $\mu$ M thapsigargin (positive control for ER stress) treatment for 5 hr.

(E) Flow cytometry histograms of APV/EPV-DsRed2-ER-5 in HeLa and U2OS cells.

(F,G) Representative fluorescence micrographs (F) and flow cytometry histograms (G) of APV/EPV-GCaMP6s-ER-5 in COS-7 cells.

(H) Representative RUSH image sequence of EPV-SBP-DsRed2-ER-5. 80  $\mu$ M biotin was added at time 0.

(I) Representative fluorescence micrographs of DPV/QPV/NPV-DsRed2-ER-5 in COS-7 cells.

(J) Subcellular distributions of different XPV-DsRed2-ER-5 variants. The "A" and "E" data duplicates that of "ER-5" in Figure 1D and that of Figure 3C, respectively.

(K) Representative RUSH image sequences of TPV/EPV-CXCL9-mCherry-SBP. Whereas the wild-type (TPV; top) exhibited efficient ER-to-Golgi transport via the t-ERGIC (arrow), the EPV mutant (bottom) was transported more slowly without appreciable t-ERGIC formation. 80  $\mu$ M biotin was added at time 0. The "25 min" images correspond to Figure 3L.

(L) Representative two-color fluorescence micrographs of TPV/EPV-CXCL9-mCherry-SBP (green) and immunolabeled Rab1B (magenta) for RUSH experiments fixed at 25 min after biotin addition, showing substantial colocalization of the wild-type (TPV) version with the Rab1B-positive t-ERGIC tubules.

Scale bars: 5  $\mu$ m. Error bars: SEM (n = 3 with ~50 cells in each replicate). Arrows point to t-ERGICs.

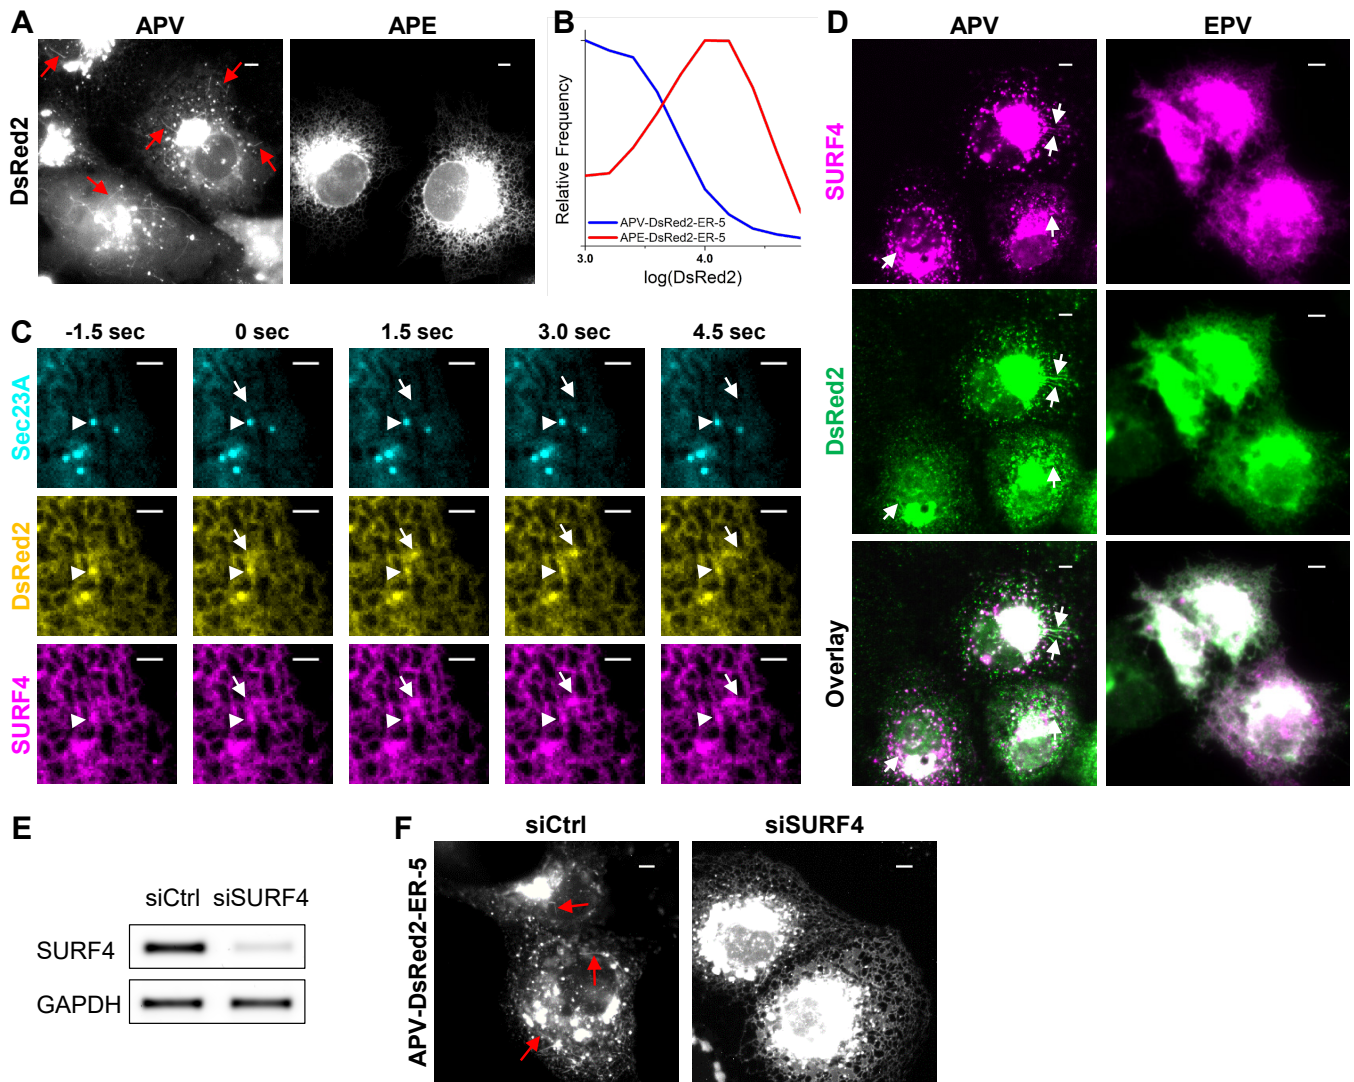

**Figure S4. SURF4 Recognizes the N-terminus of the Cargo and Co-traffics with Its Selected Cargo via t-ERGICs, Related to Figure 4**

(A,B) Representative fluorescence micrographs (A) and flow cytometry histograms (B) of APV/APE-DsRed2-ER-5 in COS-7 cells.

(C) Image sequence showing *de novo* generation of a t-ERGIC through the co-budding of AcGFP1-SURF4 (magenta) and APV-DsRed2-ER-5 (yellow) but not JF635-labeled HaloTag-Sec23A (cyan). Arrowhead marks the ERES. Arrow indicates the t-ERGIC.

(D) Representative immunofluorescence images of FLAG-SURF4 (magenta) in COS-7 cells co-transfected with APV/EPV-DsRed2-ER-5 (green).

(E) RT-PCR of SURF4 mRNA in control and SURF4 siRNA-treated cells.

(F) Representative live-cell images of APV-DsRed2-ER-5 in control and SURF4 siRNA-treated cells.

Arrows indicate t-ERGICs. Scale bars: 5  $\mu$ m (A,D,F); 2  $\mu$ m (C).



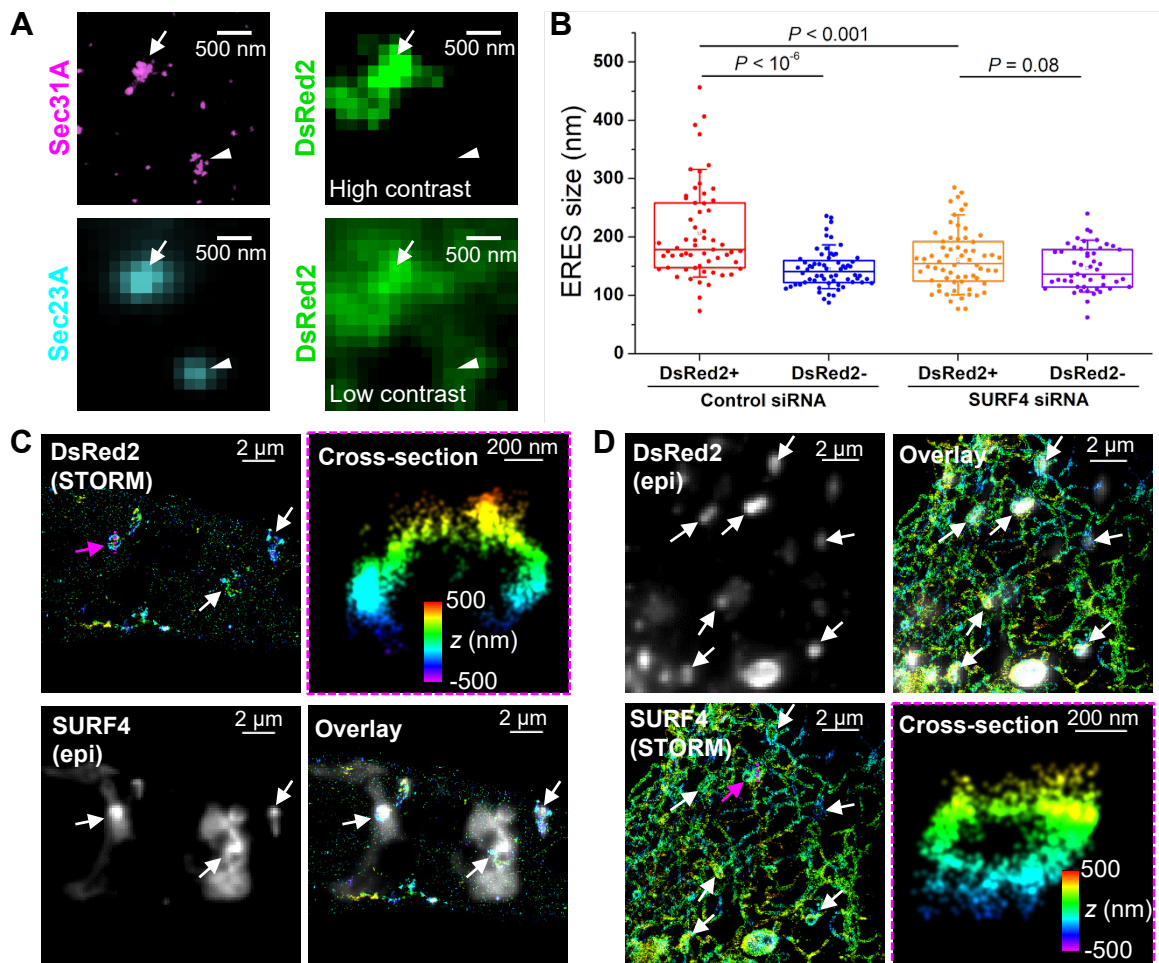

**Figure S5. SURF4 and Its Cargo Co-cluster to Expand the ERES, Related to Figure 5**

(A) DsRed2-loaded (arrow) and non-loaded (arrowhead) ERESs in a SURF4 siRNA-treated cell. STORM image of Sec31A is shown as magenta, and epifluorescence of EGFP-Sec23A and APV-DsRed2-ER-5 are shown as cyan and green, respectively. With SURF4 knockdown, the APV-DsRed2-ER-5 cargo no longer clustered strongly at the ERES, so that DsRed2-loaded and non-loaded ERESs were subjectively assigned based on enhanced contrast of the epifluorescence image.

(B) Statistics of the sizes of DsRed2-loaded and non-loaded, Sec23A-positive ERESs, based on the STORM-determined sizes of the Sec31A clusters, in control and SURF4 siRNA-treated cells. Whiskers and boxes show 10%, 25%, 50%, 75%, and 90% quantiles.  $P$  values are calculated by the two-tailed  $t$  test.  $n = 4$  STORM images were quantified.

(C,D) 3D-STORM of immunolabeled APV-SBP-DsRed2-ER-5 (C) or AcGFP1-SURF4 (D), in comparison with epifluorescence images of AcGFP1-SURF4 (C) or APV-SBP-DsRed2-ER-5 (D) of the same views in a RUSH experiment. For cargo release, 80  $\mu$ M biotin was added 40 min before sample fixation. Arrows indicate co-clustered large SURF4 and DsRed2 domains. Vertical cross-sections of the STORM images are given for the large co-clusters indicated by the magenta arrows, showing membrane localizations for both proteins. Colors in the 3D-STORM images encode axial positions (depth).



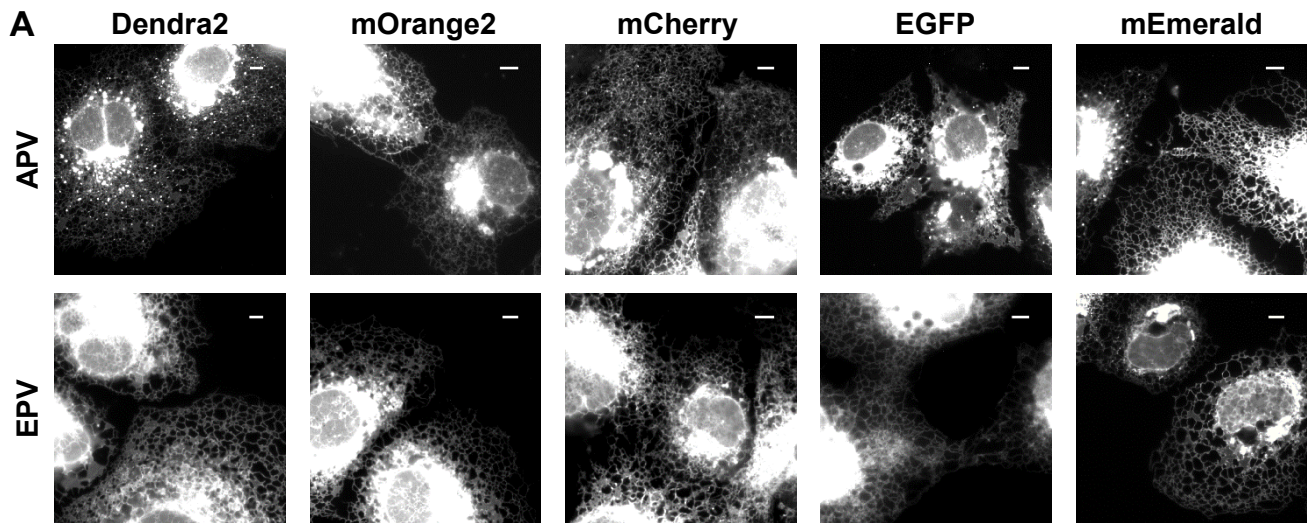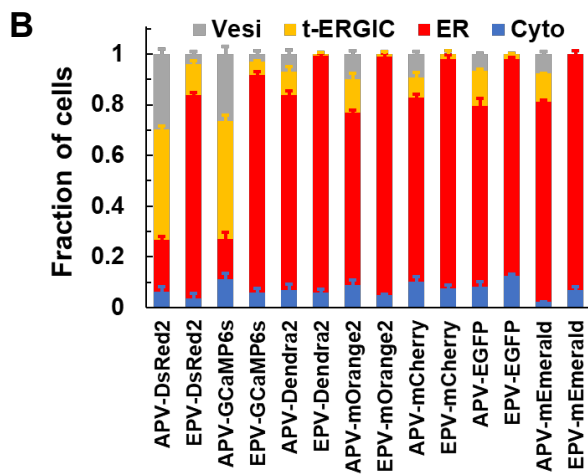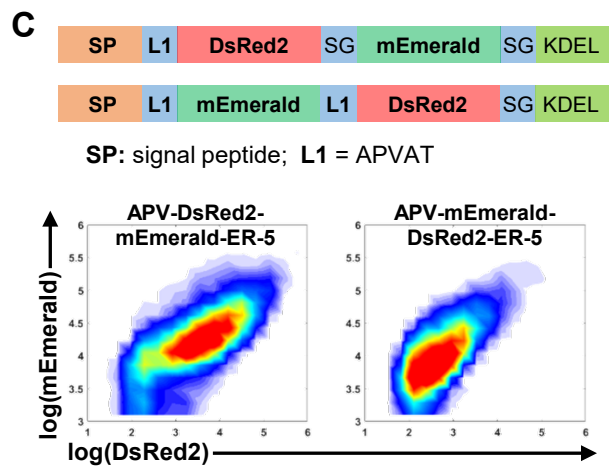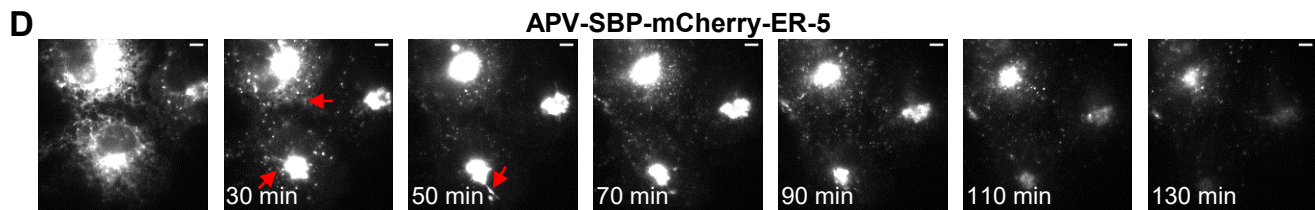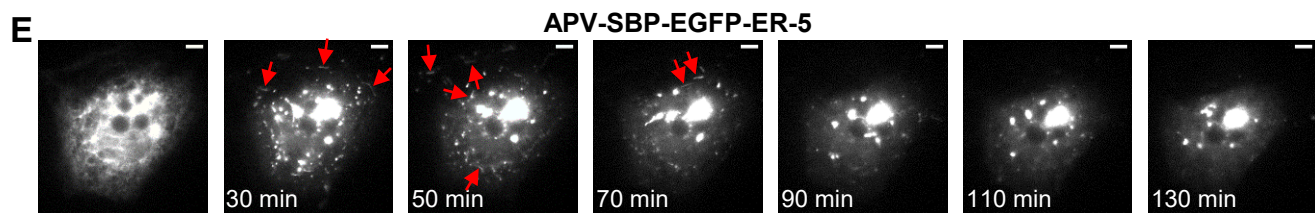

**Figure S6. Distinct Steady-State Localizations of Different FP-ER-5 Constructs, Related to Figure 6**

(A) Representative fluorescence micrographs of APV/EPV-Dendra2-ER-5, APV/EPV-mOrange2-ER-5, APV/EPV-mCherry-ER-5, APV/EPV-EGFP-ER-5, and APV/EPV-mEmerald-ER-5 in COS-7 cells.

(B) Subcellular distributions of different APV/EPV-FP-ER-5 constructs. The APV-DsRed2 and EPV-DsRed2 data duplicate that of “ER-5” in Figure 1D and that of Figure 3C, respectively. The APV-mOrange2 data duplicates that in Figure 6I. Error bars: SEM (n = 3 with ~50 cells in each replicate).

(C) Sequences and flow cytometry of APV-DsRed2-mEmerald-ER-5 and APV-mEmerald-DsRed2-ER-5.

(D,E) RUSH image sequences of APV-SBP-mCherry-ER-5 (D) and APV-SBP-EGFP-ER-5 (E) showing efficient ER exit and the formation of t-ERGIC. Arrows indicate t-ERGICs.

Scale bars: 5  $\mu$ m.

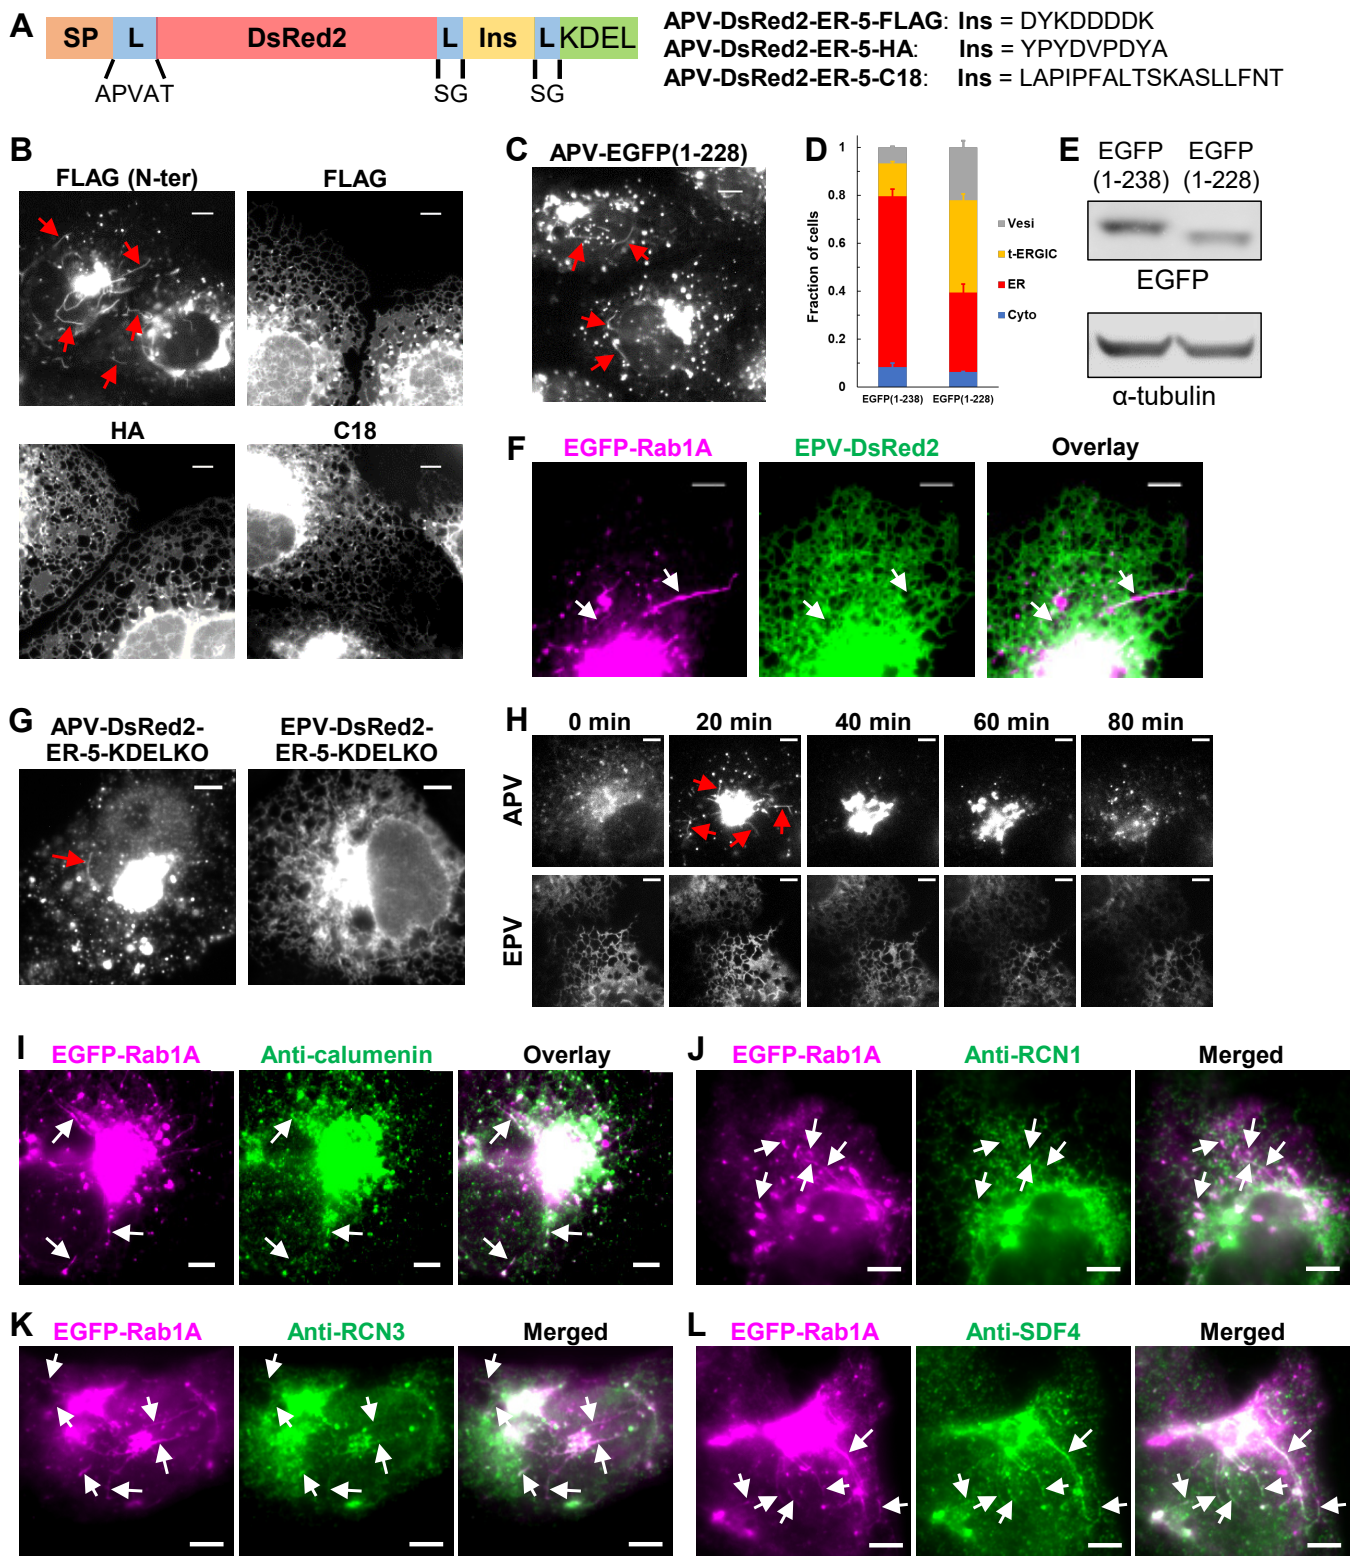

**Figure S7. SURF4-KDEL<sub>R</sub> Antagonism Determines the Localization of Cargo Proteins, Related to Figure 6**  
 (A) Schematics of different C-terminal insertions of APV-DsRed2-ER-5.  
 (B) Representative fluorescence micrographs of APV-FLAG-DsRed2-ER-5, APV-DsRed2-ER-5-FLAG, APV-DsRed2-ER-5-HA, and APV-DsRed2-ER-5-C18 in COS-7 cells.  
 (C) Representative fluorescence micrograph of APV-EGFP(1-228)-ER-5 in COS-7 cells, showing t-ERGICs.  
 (D,E) Subcellular distributions (D) and immunoblots (E) of APV-EGFP(1-238)-ER-5 and the C-terminally truncated APV-EGFP(1-228)-ER-5. Error bar: SEM (n = 3 with ~50 cells in each replicate). The APV-EGFP(1-238)-ER-5 subcellular distribution in (D) duplicates “APV-EGFP-ER-5” in Figure S6B.

(F) Two-color live-cell fluorescence micrographs of EGFP-Rab1A and EPV-DsRed2-ER-5-HA in a co-transfected COS-7 cell.

(G) Representative immunofluorescence images of APV/EPV-DsRed2-ER-5-KDELKO in COS-7 cells.

(H) Representative RUSH image sequences of APV/EPV-DsRed2-ER-5-KDELKO in RUSH, showing t-ERGIC-mediated fast ER-to-Golgi transport for the APV (top) but not the EPV (bottom) version. The “20 min” images correspond to Figure 6L.

(I-L) Two-color fluorescence micrographs of EGFP-Rab1A vs. immunolabeled endogenous calumenin (I), RCN1 (J), RCN3 (K), and SDF4 (L) in COS-7 (I) and U2OS (J-L) cells.

Scale bars: 5  $\mu$ m. Arrows point to t-ERGICs.

## SUPPLEMENTAL TABLES

**Table S1.** Analysis of the P1' N-terminal tripeptide and the C-terminal tetrapeptide for the 61 proteins annotated as "ER-lumen" in a subcellular fractionation-mass spectrometry dataset of HeLa cells (Itzhak et al., 2016), related to Figure 7B.

| Lead protein ID | Lead protein name                                            | MS Count | P1' N-term. | SURF4 comp.* | C-term. | KDEL-like& |
|-----------------|--------------------------------------------------------------|----------|-------------|--------------|---------|------------|
| P14625          | Endoplasmin                                                  | 16455    | DDE         | 0            | KDEL    | 1          |
| P11021          | 78 kDa glucose-regulated protein                             | 14834    | EEE         | 0            | KDEL    | 1          |
| P27797          | Calreticulin                                                 | 12114    | EPA         | 0            | KDEL    | 1          |
| P07237          | Protein disulfide-isomerase                                  | 10550    | DAP         | 0            | KDEL    | 1          |
| P13667          | Protein disulfide-isomerase A4                               | 8929     | EGP         | 0            | KEEL    | 1          |
| P30101          | Protein disulfide-isomerase A3                               | 7193     | SDV         | 0            | QEDL    | 1          |
| Q9Y4L1          | Hypoxia up-regulated protein 1                               | 7049     | DTL         | 0            | NDEL    | 1          |
| P50454          | Serpin H1                                                    | 6053     | AEV         | 0            | RDEL    | 1          |
| Q9NYU2          | UDP-glucose:glycoprotein glucosyltransferase 1               | 5755     | DSK         | 0            | REEL    | 1          |
| P14314-2        | Glucosidase 2 subunit beta                                   | 5273     | VEV         | 0            | HDEL    | 1          |
| Q32P28          | Prolyl 3-hydroxylase 1                                       | 2550     | EVE         | 0            | KDEL    | 1          |
| Q8IXB1          | DnaJ homolog subfamily C member 10                           | 1581     | DQD         | 0            | KDEL    | 1          |
| Q9H488          | GDP-fucose protein O-fucosyltransferase 1                    | 1290     | WDP         | 0            | RDEF    | 1          |
| Q14696          | LDLR chaperone MESD                                          | 1226     | AEG         | 0            | REDL    | 1          |
| Q8NBJ7          | Sulfatase-modifying factor 2                                 | 1205     | QAT         | 0            | PGEL    | 1          |
| Q6UW63          | KDEL motif-containing protein 1                              | 1154     | ETG         | 0            | KDEL    | 1          |
| Q9BT09          | Protein canopy homolog 3                                     | 521      | GAE         | 0            | PDEL    | 1          |
| Q5NDL2          | EGF domain-specific O-linked N-acetylglucosamine transferase | 344      | GQN         | 0            | HDEL    | 1          |
| O95994          | Anterior gradient protein 2 homolog                          | 258      | RDT         | 0            | KTEL    | 1          |
| Q9Y680-2        | Peptidyl-prolyl cis-trans isomerase FKBP7                    | 253      | QRQ         | 0            | HDEL    | 1          |
| Q8IXL7-2        | Methionine-R-sulfoxide reductase B3                          | 207      | QSG         | 0            | KAEL    | 1          |
| P23284          | Peptidyl-prolyl cis-trans isomerase B                        | 4647     | DEK         | 0            | IAKE    | 0          |
| O00469-2        | Procollagen-lysine,2-oxoglutarate 5-dioxygenase 2            | 3477     | ADS         | 0            | FIDP    | 0          |
| Q02809          | Procollagen-lysine,2-oxoglutarate 5-dioxygenase 1            | 3469     | KGD         | 0            | FVDP    | 0          |
| O60568          | Procollagen-lysine,2-oxoglutarate 5-dioxygenase 3            | 3164     | SDR         | 0            | FVDP    | 0          |
| Q96HE7          | ERO1-like protein alpha                                      | 1927     | EEQ         | 0            | QNIH    | 0          |
| Q9UBS4          | DnaJ homolog subfamily B member 11                           | 1889     | GRD         | 0            | LQGY    | 0          |
| O15460          | Prolyl 4-hydroxylase subunit alpha-2                         | 982      | EFF         | 0            | TEVD    | 0          |
| Q15818          | Neuronal pentraxin-1                                         | 794      | QDF         | 0            | RQIN    | 0          |
| Q92791          | Synaptonemal complex protein SC65                            | 425      | QYE         | 0            | PELA    | 0          |
| Q9H173          | Nucleotide exchange factor SIL1                              | 357      | HQN         | 0            | KELR    | 0          |
| O95479          | GDH/6PGL endoplasmic bifunctional protein                    | 247      | QEL         | 0            | AFLG    | 0          |
| Q9Y2G5          | GDP-fucose protein O-fucosyltransferase 2                    | 246      | SGQ         | 0            | KITY    | 0          |
| Q96AY3          | Peptidyl-prolyl cis-trans isomerase FKBP10                   | 4278     | RGL         | 0.5          | HEEL    | 1          |
| Q15084          | Protein disulfide-isomerase A6                               | 3286     | LYS         | 0.5          | KDEL    | 1          |
| Q8NBS9          | Thioredoxin domain-containing protein 5                      | 3266     | GRW         | 0.5          | KDEL    | 1          |



|          |                                                                             |      |     |     |      |   |
|----------|-----------------------------------------------------------------------------|------|-----|-----|------|---|
| P30040   | Endoplasmic reticulum resident protein 29                                   | 2720 | LHT | 0.5 | KEEL | 1 |
| Q8NBJ5   | Procollagen galactosyltransferase 1                                         | 2028 | YFP | 0.5 | RDEL | 1 |
| Q14257   | Reticulocalbin-2                                                            | 1894 | GKA | 0.5 | HDEL | 1 |
| Q9Y2B0   | Protein canopy homolog 2                                                    | 1857 | RRS | 0.5 | HDEL | 1 |
| O95881   | Thioredoxin domain-containing protein 12                                    | 1356 | HNG | 0.5 | EDEL | 1 |
| Q14554   | Protein disulfide-isomerase A5                                              | 1202 | KVS | 0.5 | KEEL | 1 |
| Q9HCN8   | Stromal cell-derived factor 2-like protein 1                                | 1111 | AKT | 0.5 | HDEL | 1 |
| Q99470   | Stromal cell-derived factor 2                                               | 779  | LGV | 0.5 | HAEL | 1 |
| Q9NYU1   | UDP-glucose:glycoprotein<br>glucosyltransferase 2                           | 638  | SKS | 0.5 | HDEL | 1 |
| P26885   | Peptidyl-prolyl cis-trans isomerase FKBP2                                   | 621  | TGA | 0.5 | RTEL | 1 |
| Q9H6E4   | Coiled-coil domain-containing protein 134                                   | 528  | TLR | 0.5 | QSEL | 1 |
| Q9UNW1   | Multiple inositol polyphosphate phosphatase<br>1                            | 514  | SLL | 0.5 | SDEL | 1 |
| Q6UWW8   | Carboxylesterase 3                                                          | 325  | TGP | 0.5 | QEDL | 1 |
| P04844   | Dolichyl-diphosphooligosaccharide--protein<br>glycosyltransferase subunit 2 | 2456 | LTP | 0.5 | RTAH | 0 |
| Q14165   | Malectin                                                                    | 1824 | PGL | 0.5 | LCRL | 0 |
| Q13217   | DnaJ homolog subfamily C member 3                                           | 1502 | GVN | 0.5 | FHFN | 0 |
| P43307   | Translocon-associated protein subunit alpha                                 | 1008 | RGG | 0.5 | GSDE | 0 |
| P43251   | Biotinidase                                                                 | 255  | AHT | 0.5 | YERD | 0 |
| O60613   | 15 kDa selenoprotein                                                        | 254  | FGA | 0.5 | LERI | 0 |
| O43852   | Calumenin                                                                   | 3514 | KPT | 1   | HDEF | 1 |
| Q15293   | Reticulocalbin-1                                                            | 3128 | KPT | 1   | HDEL | 1 |
| Q8IVL5   | Prolyl 3-hydroxylase 2                                                      | 1839 | GPP | 1   | KDEL | 1 |
| O95302   | Peptidyl-prolyl cis-trans isomerase FKBP9                                   | 1523 | APV | 1   | HDEL | 1 |
| Q96D15   | Reticulocalbin-3                                                            | 1174 | KPS | 1   | HDEL | 1 |
| P13674-2 | Prolyl 4-hydroxylase subunit alpha-1                                        | 2267 | HPG | 1   | SELE | 0 |

\* SURF4 compatibility is evaluate based on the P1' N-terminal tripeptide after signal peptide cleavage. 0: containing D, E, or Q. 1: X-P-Y, in which neither X nor Y is D, E, or Q. 0.5: others. Signal peptide cleavage sites were predicted by SignalP5.0 (<http://www.cbs.dtu.dk/services/SignalP>)

& 1 means a KDEL or KDEL-like C-terminus (Raykhel et al., 2007). 0 means otherwise.
